# Supplementary material for: Tenecteplase: biochemical and clot lysis activity comparisons
Source: Frontiers journal article supplement (doi:10.3389/fphar.2024.1498116), 2024-12-20
Supplement: Image_4.pdf [file Image_4.pdf]

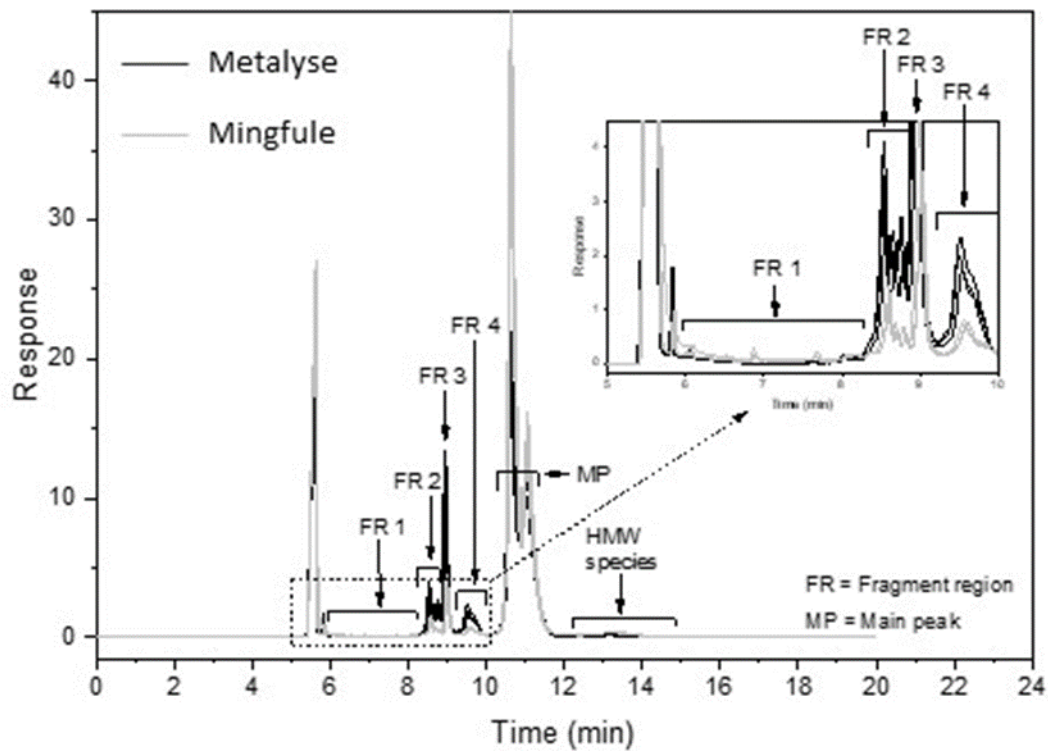

**Figure S4.** CGE reduced electropherograms (side-by-side testing) including enlarged scale.

CGE, capillary gel electrophoresis; HMW, high-molecular-weight.
